# Supplementary material for: Taxonomy of the form and function of primary care services in or alongside emergency departments: concepts paper
Source: PubMed Central journal article supplement (PMC6837280; doi:10.1136/emermed-2018-208305), 2019-09-07

**Data sources for information about Type 1 emergency departments and associated primary care services in England and Wales in 2017-18**

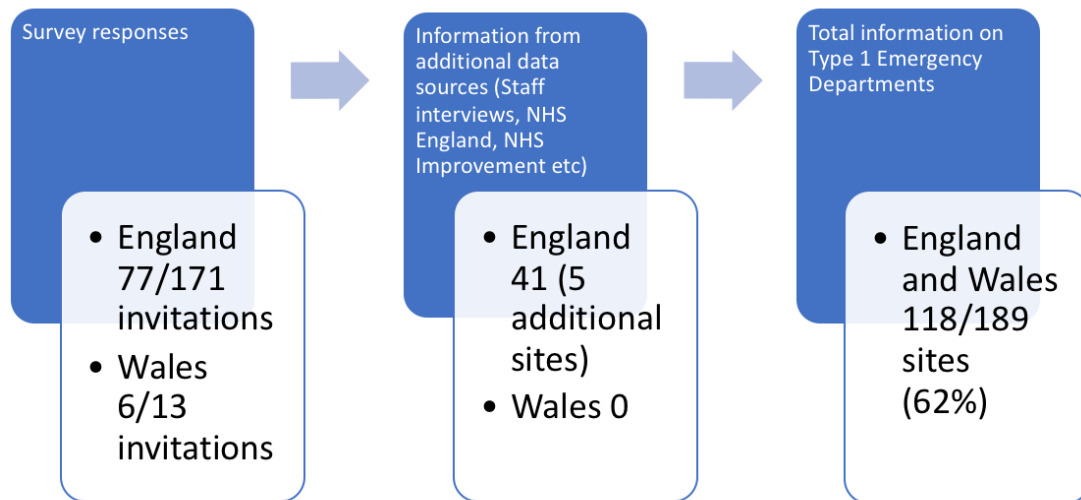

Supplement: emermed-2018-208305supp004.pdf [file emermed-2018-208305supp004.pdf]
