# Supplementary material for: Taxonomy of the form and function of primary care services in or alongside emergency departments: concepts paper
Source: PubMed Central journal article supplement (PMC6837280; doi:10.1136/emermed-2018-208305), 2019-09-07
Supplement: emermed-2018-208305supp006.pdf [file emermed-2018-208305supp006.pdf]

Supplementary data 1: Glossary of terms presented at the first stakeholder conference

| Constructs     |                                                                                      | Options                         | Description of options                                                        |
|----------------|--------------------------------------------------------------------------------------|---------------------------------|-------------------------------------------------------------------------------|
| 1. Location    | Where the GP service is located in relation to the ED                                | Adjacent                        | GP service is located next to ED but has a separate entrance                  |
|                |                                                                                      | Co-located                      | GP service is located next to the ED and has a common entrance                |
|                |                                                                                      | Embedded                        | GP service operates in a separate unit within the ED                          |
|                |                                                                                      | Integrated                      | GPs work in the ED alongside ED clinicians                                    |
| 2. Redirection | Appropriate patients are redirected <b>out of the ED</b>                             | Signposted                      | The patient is signposted to a walk-in GP service                             |
|                |                                                                                      | Appointment made                | An in-hours GP appointment or GP OOH is made for the patient                  |
|                |                                                                                      | No appointment made             | It is the patient's responsibility to make a GP appointment                   |
|                | Staff member redirecting                                                             | Receptionist                    | No clinical training                                                          |
|                |                                                                                      | ED nurse                        | ED staff nurse                                                                |
|                |                                                                                      | ED nurse practitioner           | To include emergency and advanced nurse practitioners                         |
|                |                                                                                      | ED clinician                    | To include ED consultants, staff grade and doctors in training                |
|                |                                                                                      | GP                              | To include salaried and locum GPs                                             |
|                |                                                                                      | Primary care nurse practitioner | To include primary care and out-of-hours nurse practitioners                  |
|                |                                                                                      | Primary care nurses             | Primary care practice and out-of-hours nurses                                 |
| 3. Streaming   | Patients are directed <b>into the ED</b> to the most appropriate healthcare provider | Emergency department            | The patient has an urgent/ life threatening condition requiring ED level care |
|                |                                                                                      | Primary care                    | The patient's condition meets the criteria for the primary care stream        |
|                |                                                                                      | Minor injuries                  | The patient has a minor injury                                                |
|                |                                                                                      | See and treat                   | The patient is seen and treated by the Streamer                               |
|                |                                                                                      | No streaming system             | ED Clinicians and GPs self-select their own patients                          |

Supplementary data 1: Glossary of terms presented at the first stakeholder conference

|            |                                                        |                                 |                                                                                                                                                                                                                         |
|------------|--------------------------------------------------------|---------------------------------|-------------------------------------------------------------------------------------------------------------------------------------------------------------------------------------------------------------------------|
|            | Staff member streaming                                 | Receptionist                    | No clinical training                                                                                                                                                                                                    |
|            |                                                        | ED nurse                        | ED staff nurse                                                                                                                                                                                                          |
|            |                                                        | ED nurse practitioner           | To include emergency and advanced nurse practitioners                                                                                                                                                                   |
|            |                                                        | ED clinician                    | To include ED consultants, staff grade and doctors in training                                                                                                                                                          |
|            |                                                        | GP                              | To include salaried and locum GPs                                                                                                                                                                                       |
|            |                                                        | Primary care nurse practitioner | To include primary care and out-of-hours nurse practitioners                                                                                                                                                            |
|            |                                                        | Primary care nurse              | Primary care practice and out-of-hours nurse                                                                                                                                                                            |
|            | Streaming/<br>triage guidance                          | Manchester triage system        | A validated and widely used triage system                                                                                                                                                                               |
|            |                                                        | Locally developed criteria      | Locally developed or adapted criteria                                                                                                                                                                                   |
|            |                                                        | Other                           | Alternative guidance                                                                                                                                                                                                    |
| 4. GP role | The role the GP is expected to adopt in the ED setting | Traditional GP role             | Managing patients using the same approach taken in the primary care setting – minimal use of acute investigations                                                                                                       |
|            |                                                        | Extended GP role                | The GP takes on additional tasks, which might not be part of routine general practice (e.g. seeing patients with minor injuries) or focusses on specific groups of patients in the ED (e.g. paediatrics, frail elderly) |
|            |                                                        | Gatekeeper role                 | Redirecting appropriate primary care type patients back into the community for treatment                                                                                                                                |
|            |                                                        | ED clinician role               | The GP acts as ‘another pair of hands’ as another ED clinician                                                                                                                                                          |
|            | Patients seen by the GP                                | Primary care type problems      | A complaint that the average GP in the average GP surgery would be able to manage                                                                                                                                       |
|            |                                                        | Non-urgent problems             | Non-urgent problems including minor injury                                                                                                                                                                              |
|            |                                                        | Special patient groups          | Special groups of patients i.e. paediatrics, frail elderly                                                                                                                                                              |
|            |                                                        | Undifferentiated patients       | Same case mix as ED clinicians                                                                                                                                                                                          |
|            | GP access to investigations                            | GP tests only                   | Investigations found in the average GP surgery i.e. urine dipstix, ECG                                                                                                                                                  |
|            |                                                        | GP tests and plain X rays       | GP tests and plain X rays                                                                                                                                                                                               |
|            |                                                        | Hospital tests                  | Acute blood tests and radiology i.e. Plain X rays and CT scans                                                                                                                                                          |

Supplementary data 1: Glossary of terms presented at the first stakeholder conference

|                                                      |                                                           |                                                                                     |                                                                          |
|------------------------------------------------------|-----------------------------------------------------------|-------------------------------------------------------------------------------------|--------------------------------------------------------------------------|
| 5. GP service provision                              | The organisation responsible for providing the GP service | Hospital                                                                            | The hospital is providing the GP service, directly employs GPs           |
|                                                      |                                                           | Private GP provider                                                                 | A private company provides the GP service                                |
|                                                      |                                                           | Local GP group                                                                      | A local GP group provides the GP service                                 |
|                                                      | Clinicians employed                                       | GPs                                                                                 | To include salaried and locum GPs                                        |
|                                                      |                                                           | Primary care nurse practitioners                                                    | To include primary care and out-of-hours nurse practitioners             |
|                                                      |                                                           | Primary care nurses                                                                 | Primary care practice and out-of-hours nurses                            |
|                                                      | Employment basis                                          | Fixed shifts                                                                        | Staff who have a set number of hours/shifts on a regular basis           |
|                                                      |                                                           | Ad hoc shifts                                                                       | Staff cover shifts based on the needs of the department                  |
|                                                      | Service coverage                                          | 7 days a week                                                                       | Usual GP service coverage per week (actual coverage rather than planned) |
|                                                      |                                                           | 5-6 days a week                                                                     |                                                                          |
|                                                      |                                                           | 3-4 days a week                                                                     |                                                                          |
|                                                      |                                                           | 1-2 days a week                                                                     |                                                                          |
|                                                      | Shift pattern                                             | Day shift                                                                           | Usual shift pattern covered (can select multiple options)                |
|                                                      |                                                           | Evening shift                                                                       |                                                                          |
|                                                      |                                                           | Night shift                                                                         |                                                                          |
|                                                      |                                                           | Weekends                                                                            |                                                                          |
| Percentage patients presenting to the ED seen by GPs | <5%                                                       | Approximate number of patients presenting to the ED seen by the GP service annually |                                                                          |
|                                                      | 6-10%                                                     |                                                                                     |                                                                          |
|                                                      | 11-30%                                                    |                                                                                     |                                                                          |
|                                                      | >31 %                                                     |                                                                                     |                                                                          |

Supplementary data 1: Glossary of terms presented at the first stakeholder conference

|                          |                                              |                  |                                                          |
|--------------------------|----------------------------------------------|------------------|----------------------------------------------------------|
| 6. Hospital demographics | Volume of patients attending the ED annually | Less than 50,000 |                                                          |
|                          |                                              | 51,000-100,000   |                                                          |
|                          |                                              | 101,000-150,000  |                                                          |
|                          | Geographical description                     | Rural            | Located outside large towns and cities                   |
|                          |                                              | Urban            | Located in a large town or city                          |
|                          | Teaching hospital                            | Teaching         | Affiliated with a medical school and has students        |
|                          |                                              | Non-teaching     | Not affiliated with a medical school and has no students |

Key:

GP            General Practitioner  
 ED            Emergency Department  
 GP OOH      GP out-of-hours service
